# Supplementary material
Source: PubMed Central journal article supplement (PMC4528461)
Supplement: rsbl20150086supp3.pdf [file rsbl20150086supp3.pdf]

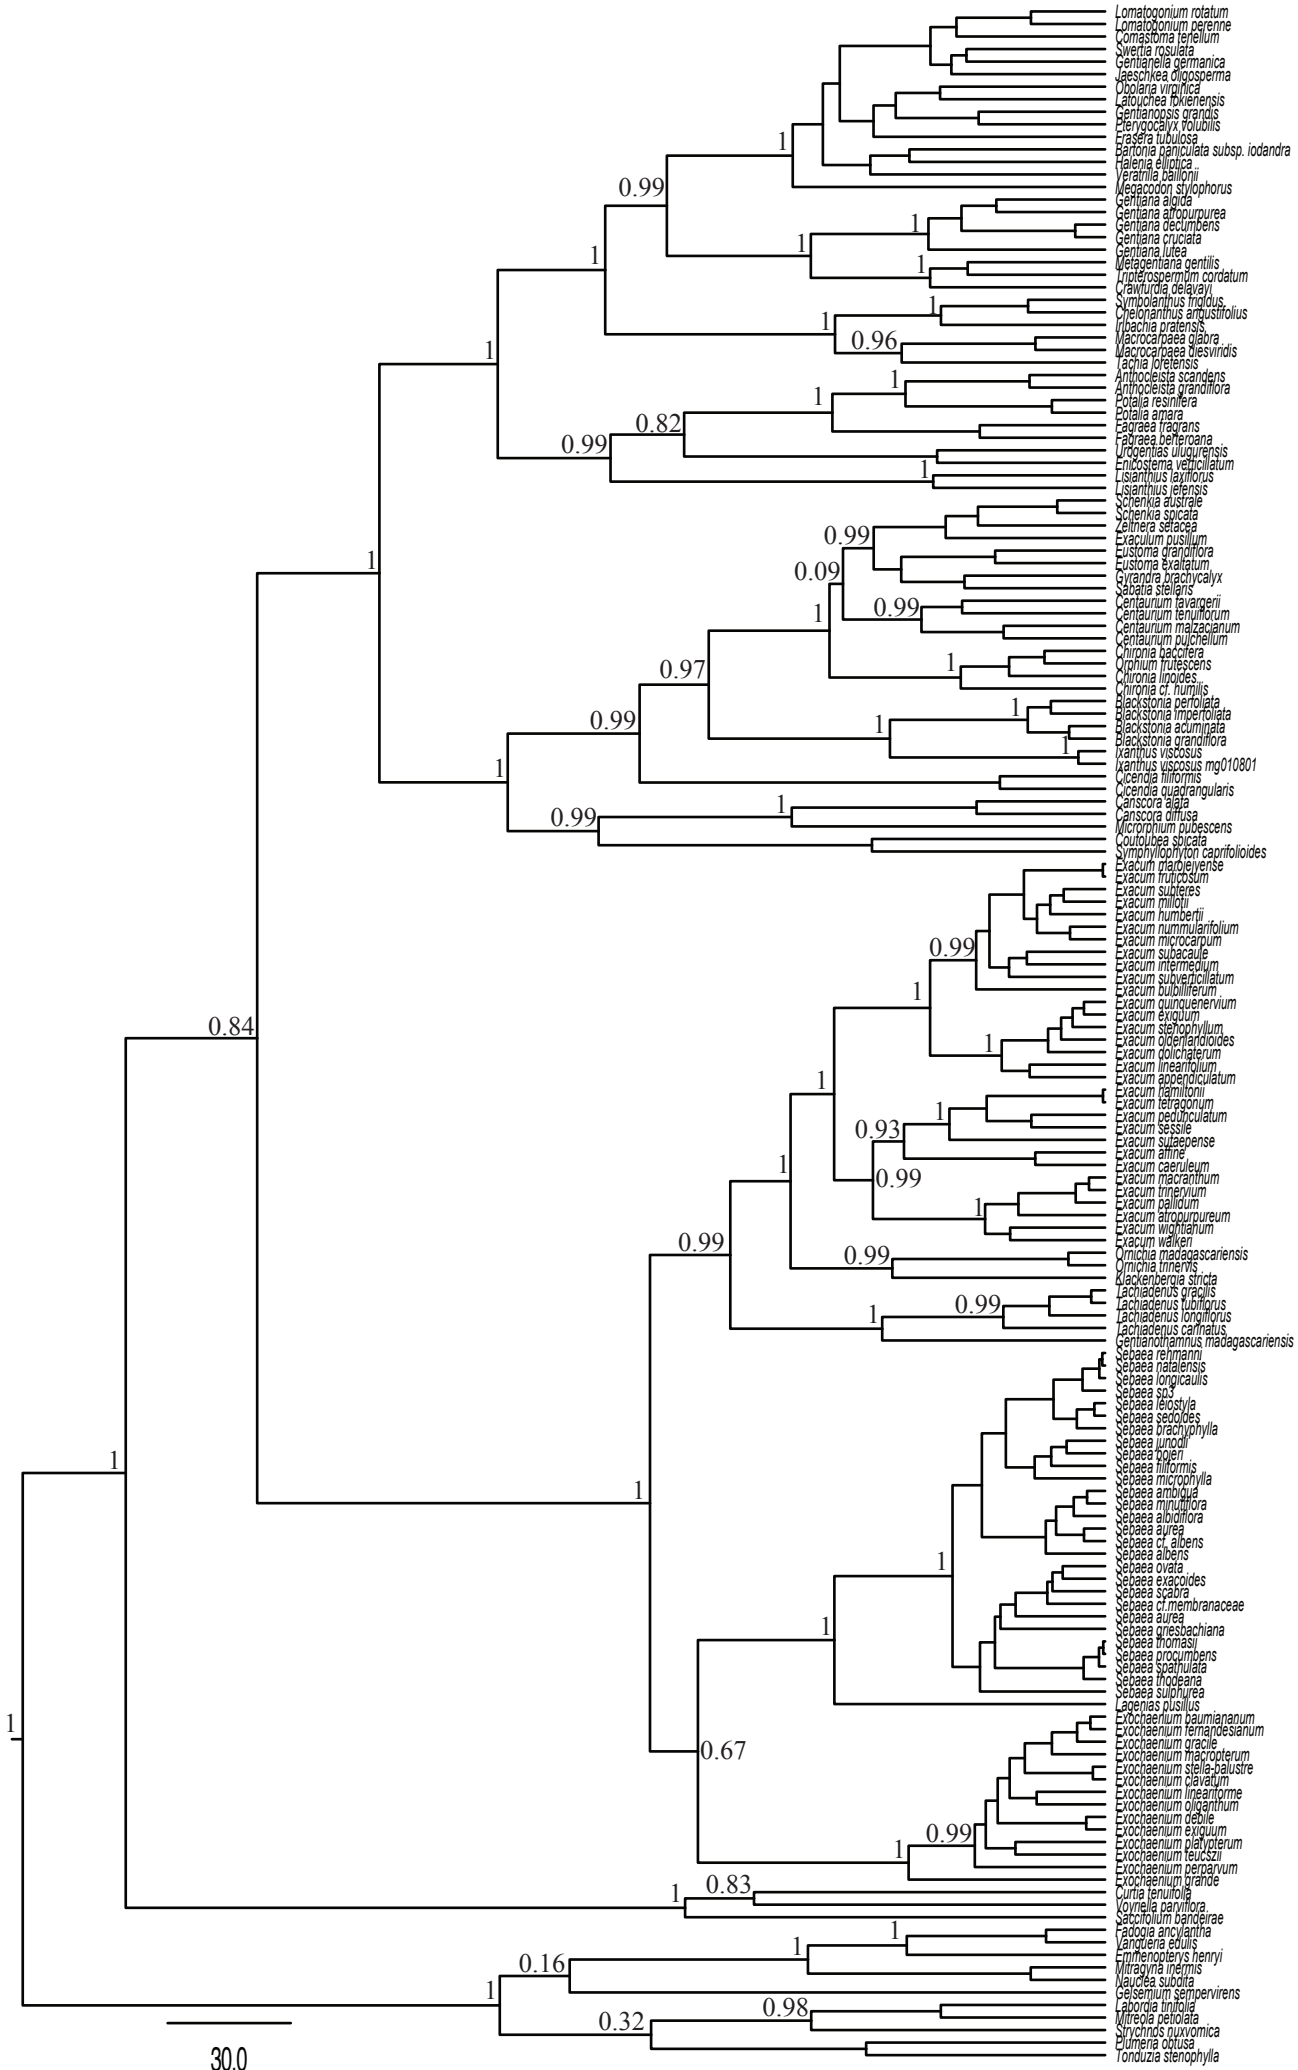

- Lomatogonium rotatum*
- Lomatogonium perenne*
- Comastoma tenellum*
- Sivertia rosulata*
- Gentianella germanica*
- Jaeschkea oligosperma*
- Alouchea viridula*
- Latouchea fokienensis*
- Gentianopsis grandis*
- Etergyacalyx volubilis*
- Passera tubulosa*
- Bartonia paniculata* subsp. *iodandra*
- Halenia elliptica*
- Veratrum ballonii*
- Meacodon stylophorus*
- Gentiana alga*
- Gentiana atropurpurea*
- Gentiana declumbens*
- Gentiana cruciata*
- Gentiana lutea*
- Metastentia gentilis*
- Kniperospermum cordatum*
- Crawfordia delavayi*
- Symbotanthus Indicus*
- Thelonanthus angustifolius*
- Iripachia pratensis*
- Macrocarpaea glabra*
- Macrocarpaea trisulcatis*
- Yachia lorentensis*
- Antiochia scandens*
- Anthocheila grandiflora*
- Potalia resinifera*
- Eptalia amara*
- Cabraea rosarans*
- Cabraea heteroana*
- Urgentia ulugurensis*
- Enicostema verticillatum*
- Lisianthus laxiflorus*
- Lisianthus leptus*
- Schenkia australe*
- Schenkia spicata*
- Zethenia setacea*
- Exaculum pusillum*
- Eustoma grandiflora*
- Eustoma exaltatum*
- Gyandra brachycalyx*
- Sabalina stielens*
- Centaurium favagenii*
- Centaurium tenuiflorum*
- Centaurium malzacianum*
- Centaurium pulchellum*
- Chironia baccata*
- Chironia trifasciata*
- Chironia lipooides*
- Chironia cf. humilis*
- Blackstonia pertoliata*
- Blackstonia imberfoliata*
- Blackstonia acuminata*
- Blackstonia grandiflora*
- Xanthus viscosus*
- Xanthus viscosus* mg010801
- Cicendia linearis*
- Cicendia quadrangularis*
- Canisora alga*
- Canisora diffusa*
- Microphium pubescens*
- Microphium spicata*
- Symphylorhizon caprifolioides*
- Exacum madagascariense*
- Exacum truncatum*
- Exacum suberosum*
- Exacum millettii*
- Exacum humbertii*
- Exacum humulifolium*
- Exacum microcarpum*
- Exacum subcaeruleum*
- Exacum intermedium*
- Exacum subverticillatum*
- Exacum bulbiferum*
- Exacum quinquevenerium*
- Exacum exiguum*
- Exacum stephophyllum*
- Exacum olerandioides*
- Exacum polichaeum*
- Exacum linearifolium*
- Exacum appendiculatum*
- Exacum ramiltonii*
- Exacum tetragonum*
- Exacum pedunculatum*
- Exacum sessile*
- Exacum suaeense*
- Exacum affine*
- Exacum caeruleum*
- Exacum macranthum*
- Exacum triseriale*
- Exacum pallidum*
- Exacum atropurpureum*
- Exacum wightianum*
- Exacum wilsonii*
- Qimichia madagascariensis*
- Qimichia trinervis*
- Blackenbergia stricta*
- Lachnadenus gracilis*
- Lachnadenus tuberosus*
- Lachnadenus longiflorus*
- Lachnadenus carinatus*
- Gentianolanius madagascariensis*
- Sebaea reimanni*
- Sebaea natalensis*
- Sebaea longicaulis*
- Sebaea sp3*
- Sebaea leostyla*
- Sebaea setodes*
- Sebaea brachyphylla*
- Sebaea junodi*
- Sebaea bojeri*
- Sebaea hirsuta*
- Sebaea microphylla*
- Sebaea ambigua*
- Sebaea mirabiliflora*
- Sebaea albiflora*
- Sebaea aurea*
- Sebaea cf. albens*
- Sebaea albens*
- Sebaea ovata*
- Sebaea excooides*
- Sebaea spura*
- Sebaea cf. membranaceae*
- Sebaea aurea*
- Sebaea gresbachiana*
- Sebaea thomasi*
- Sebaea procumbens*
- Sebaea spatulata*
- Sebaea thodeana*
- Sebaea subnivea*
- Lagenis pusillus*
- Exochaenum baumianum*
- Exochaenum fernandesianum*
- Exochaenum gracile*
- Exochaenum thalictroides*
- Exochaenum stiel-dalstre*
- Exochaenum clavatum*
- Exochaenum lineariforme*
- Exochaenum oliganthum*
- Exochaenum debile*
- Exochaenum exiguum*
- Exochaenum platypterum*
- Exochaenum teutschii*
- Exochaenum perparvum*
- Exochaenum grande*
- Curtia tenuifolia*
- Koyriella parviflora*
- Saccotilium bandeirae*
- Radogea ancyliantha*
- Leptocarpus edulis*
- Emmenopterys hennii*
- Mitragyna inermis*
- Nauorea subobata*
- Seisemum sempervirens*
- Labordia tinifolia*
- Mitrella petiolata*
- Strychnos nuxvomica*
- Clumena obtusa*
- Tonduzia stenophylla*

30.0
