# Supplementary material
Source: PubMed Central journal article supplement (PMC4528461)

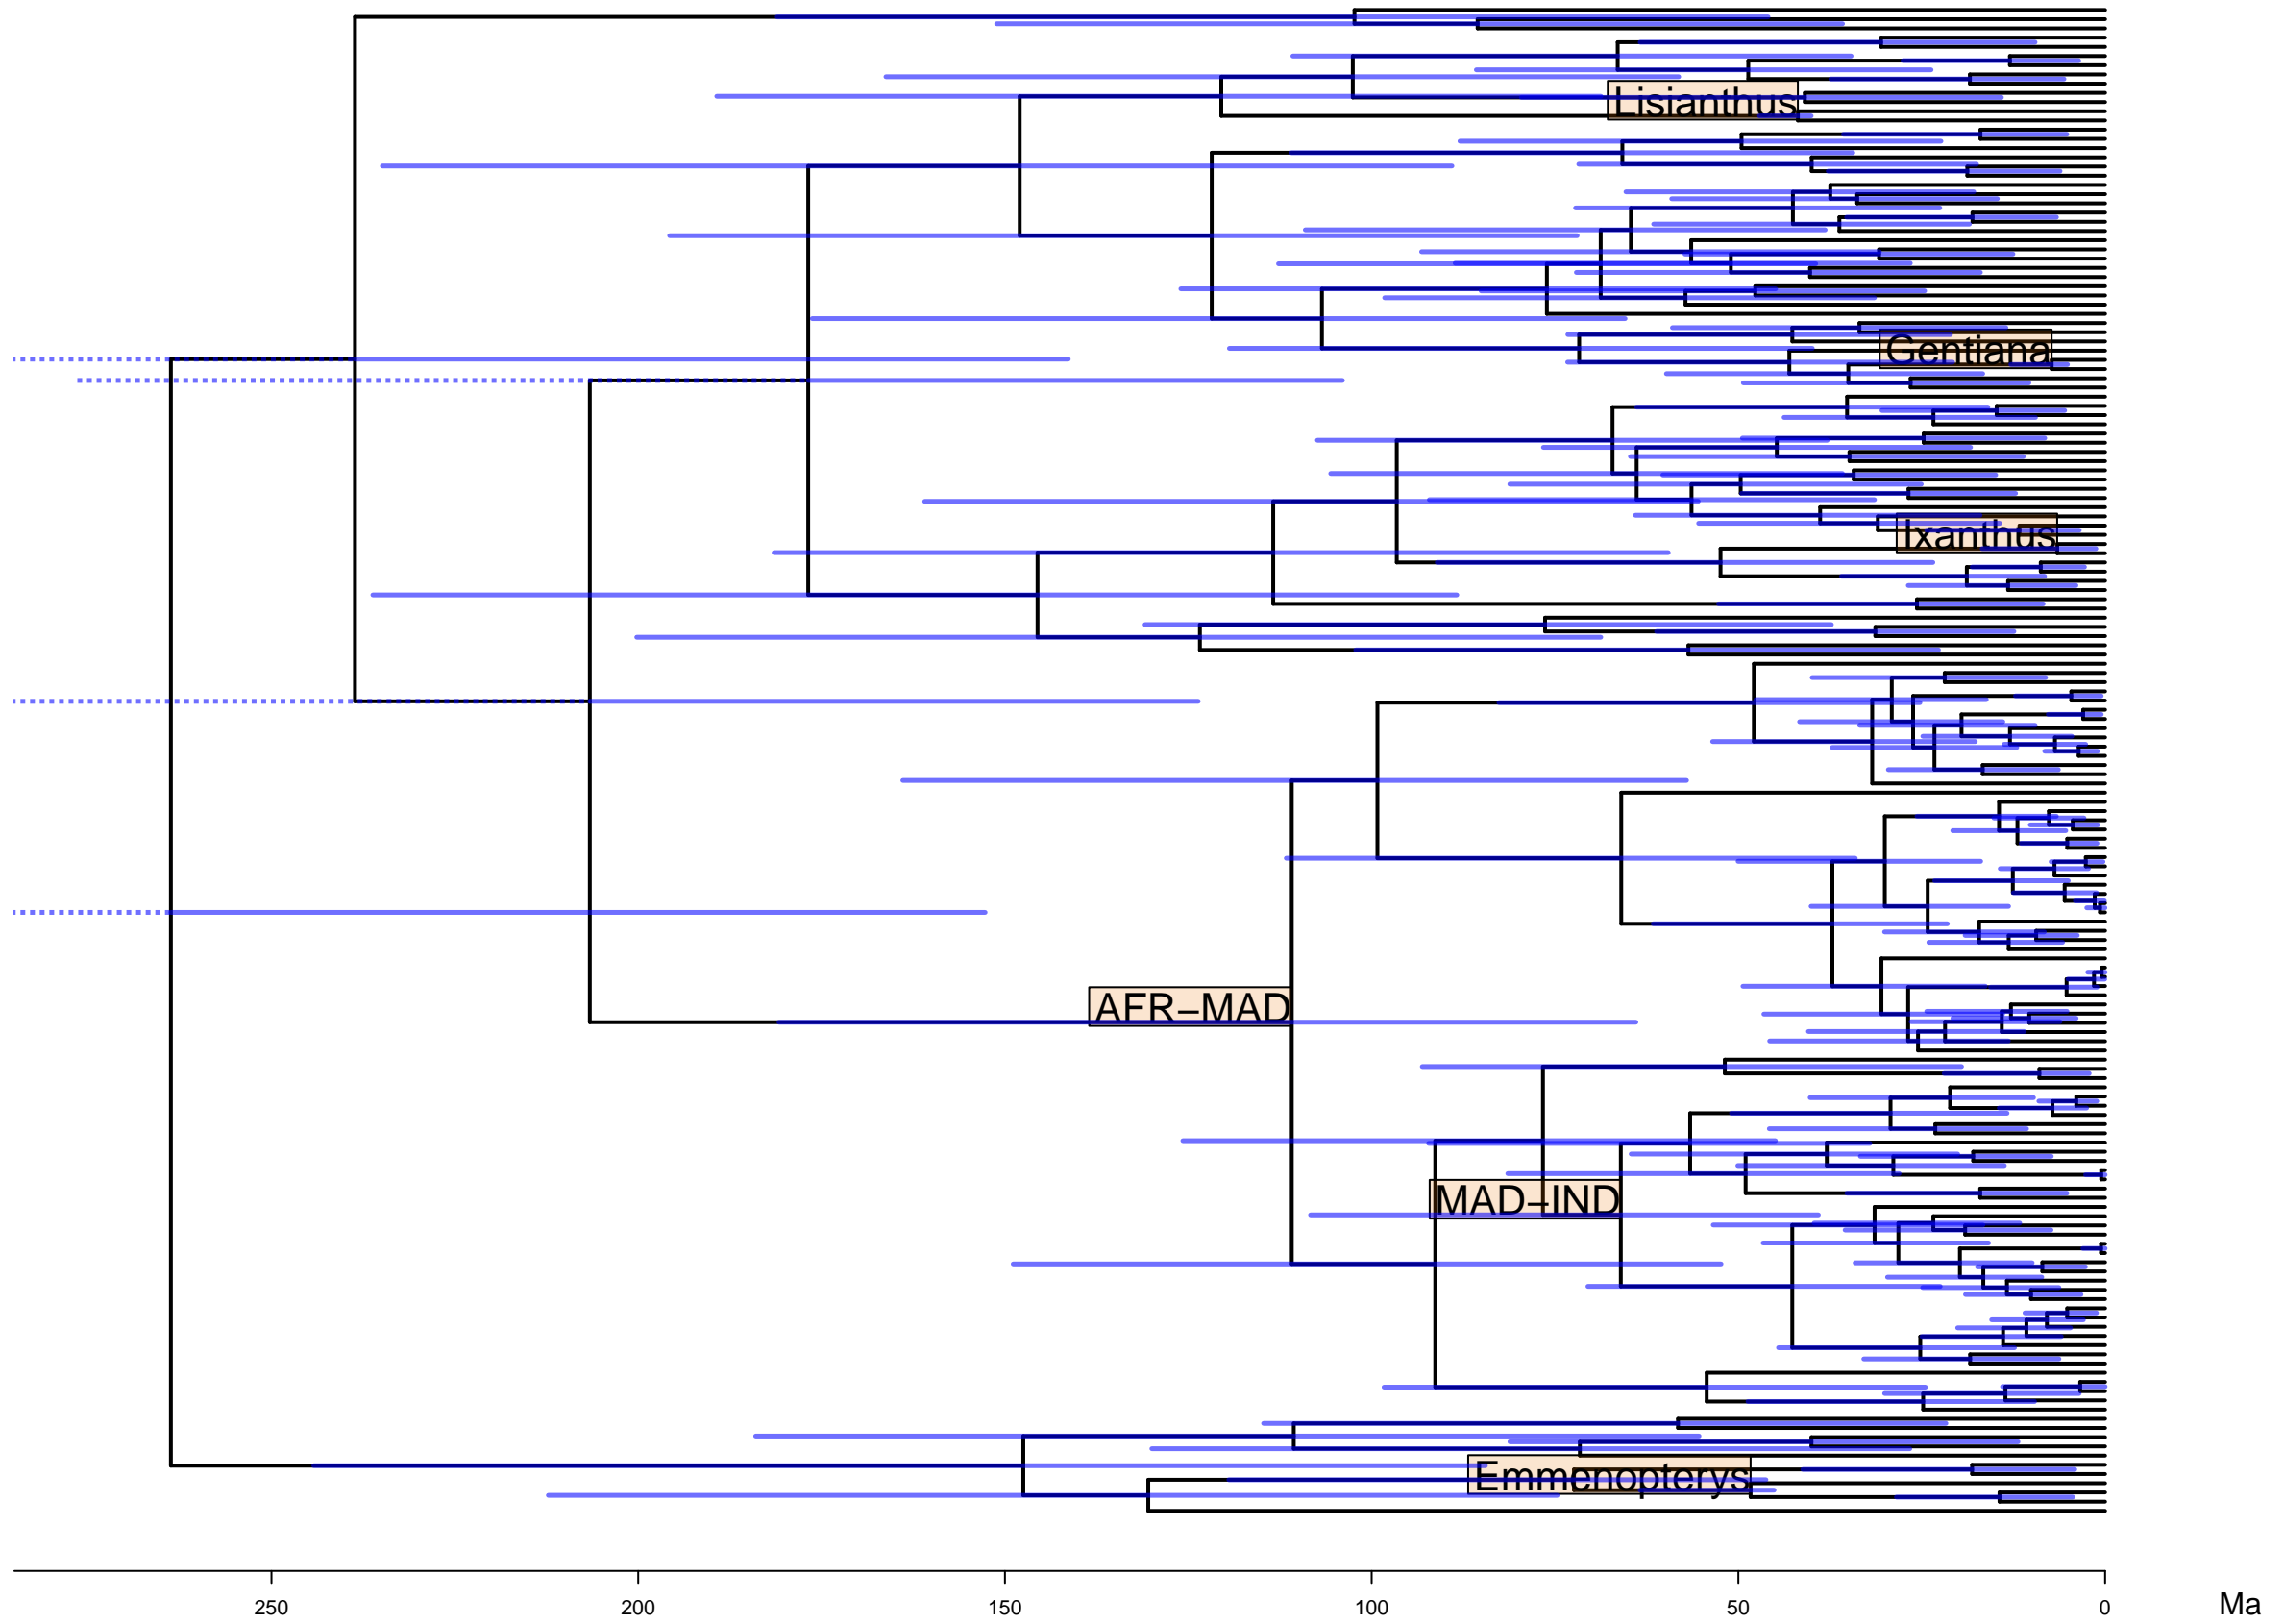

**AFR-MAD**

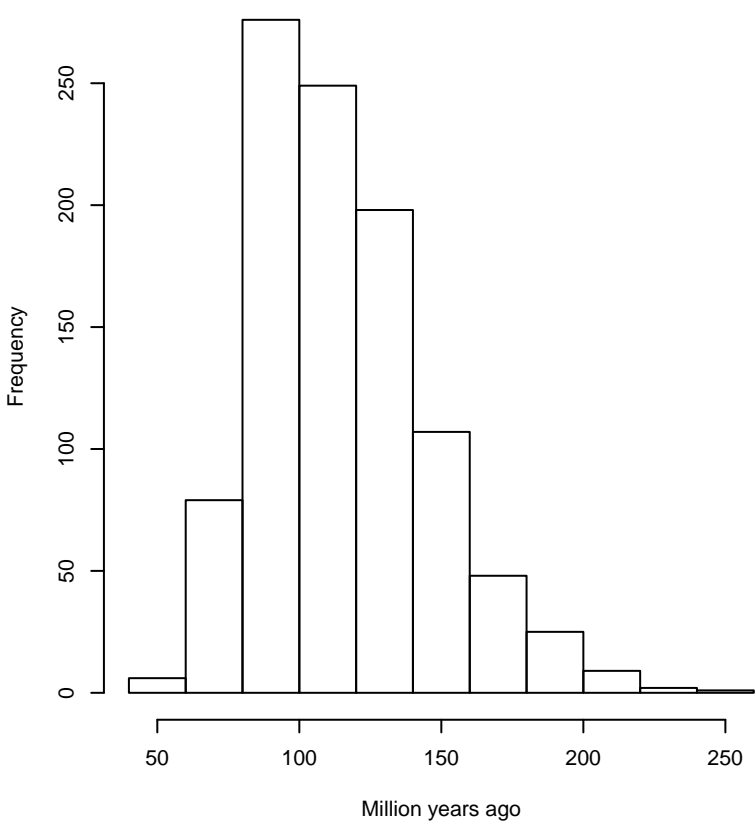

**MAD-IND**

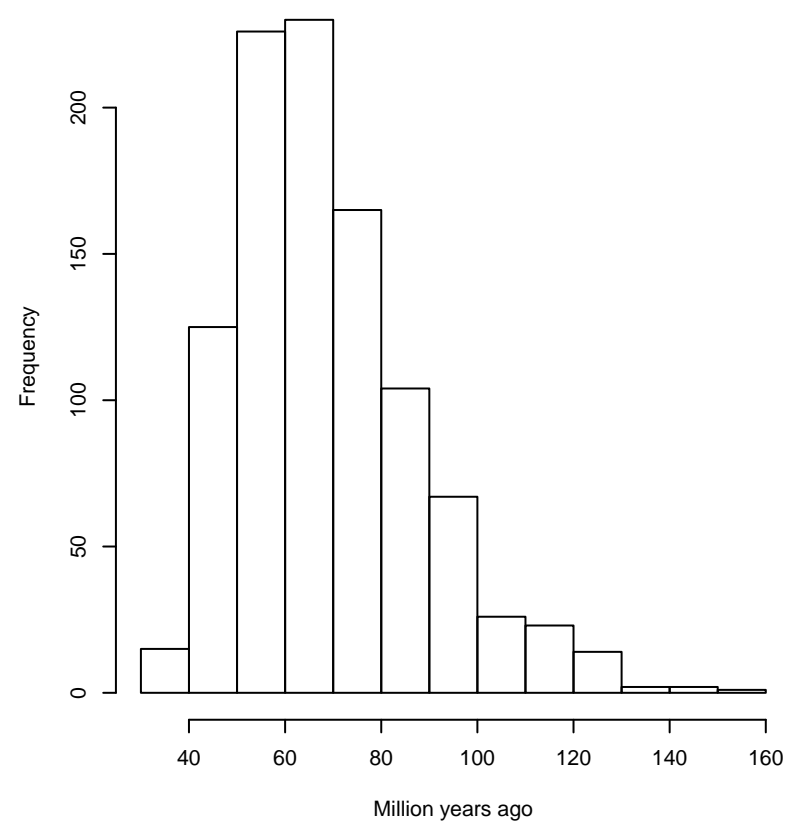

**Emmenopterys**

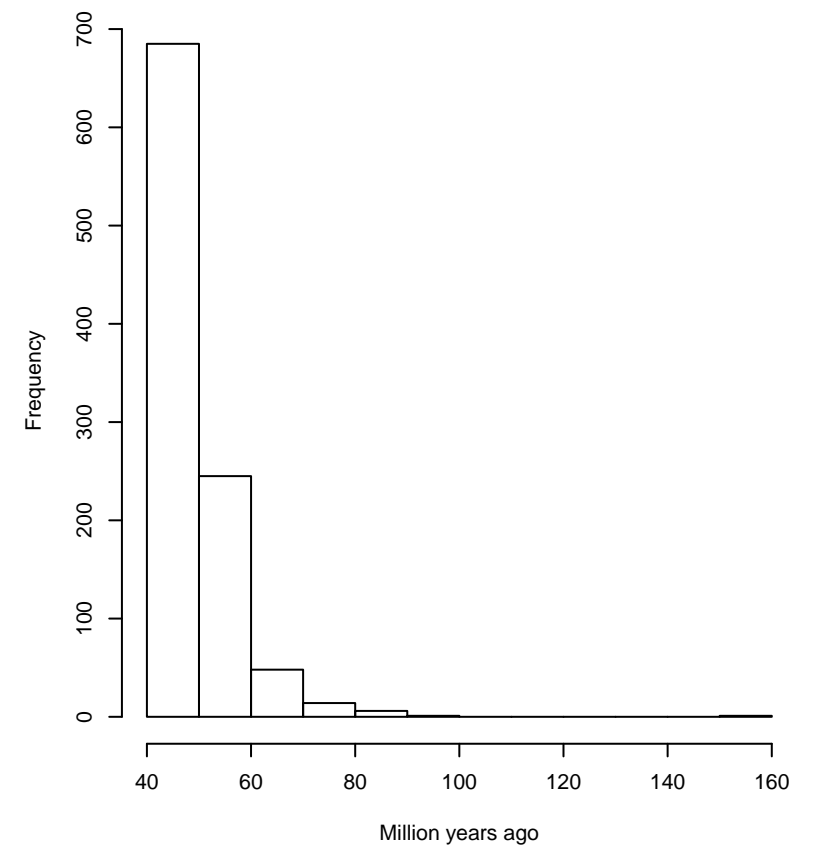

**Ixanthus**

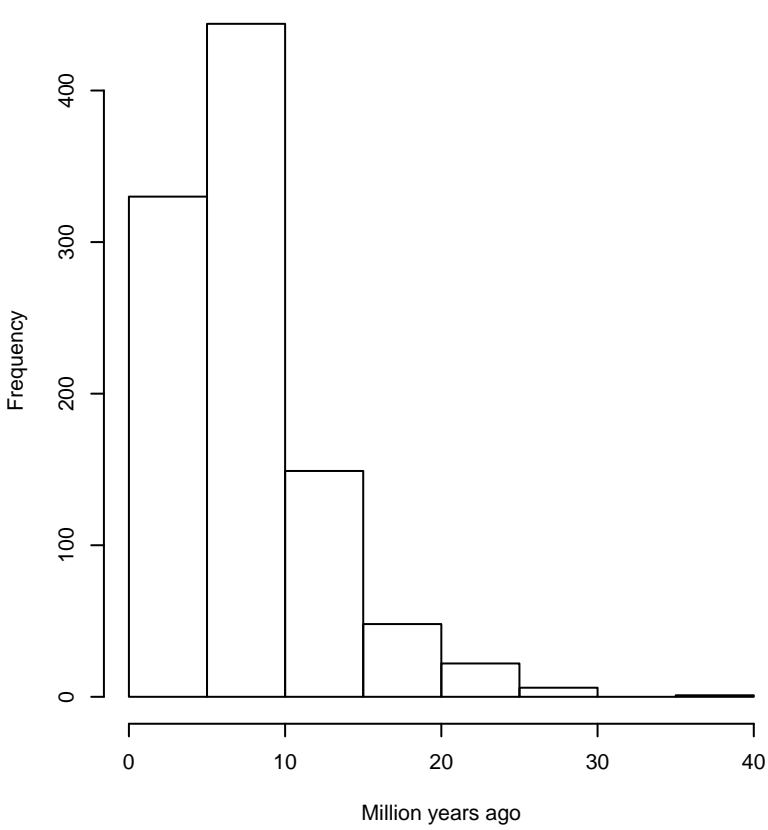

**Lisianthus**

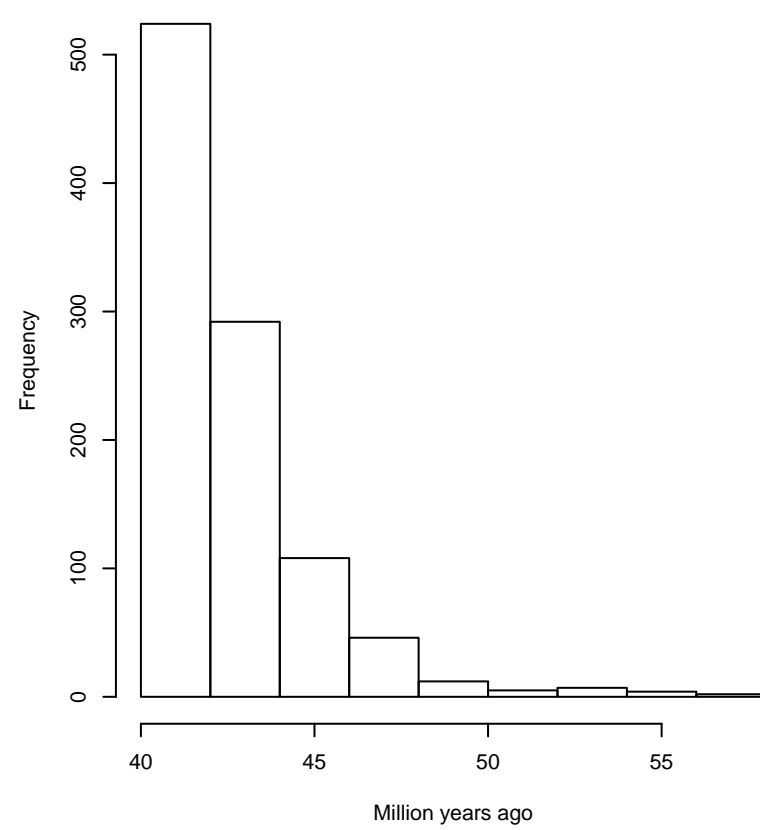

**Gentiana**

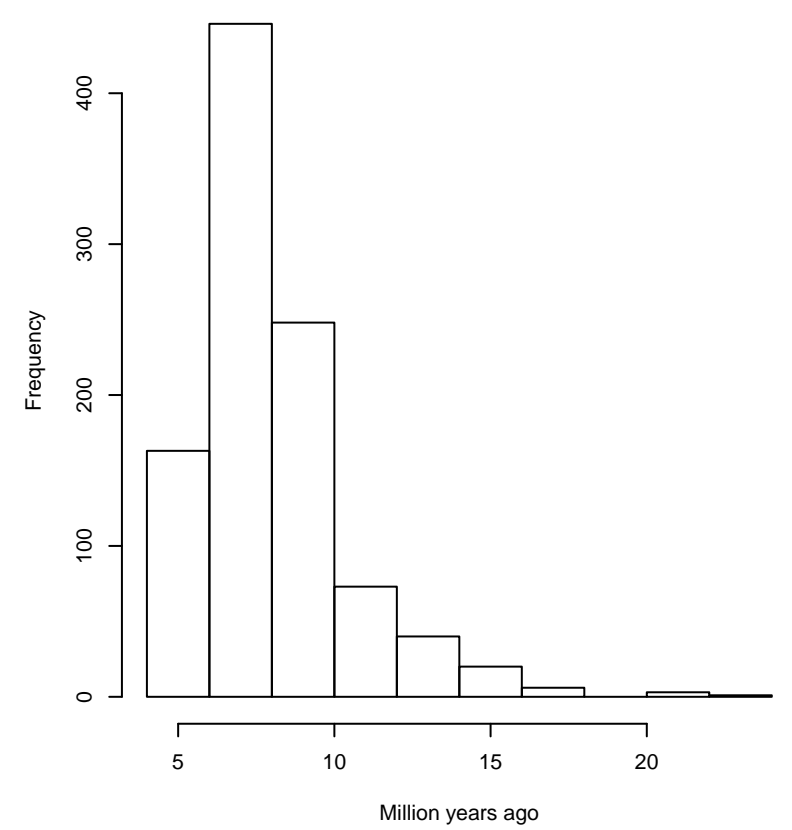

Supplement: rsbl20150086supp4.pdf [file rsbl20150086supp4.pdf]

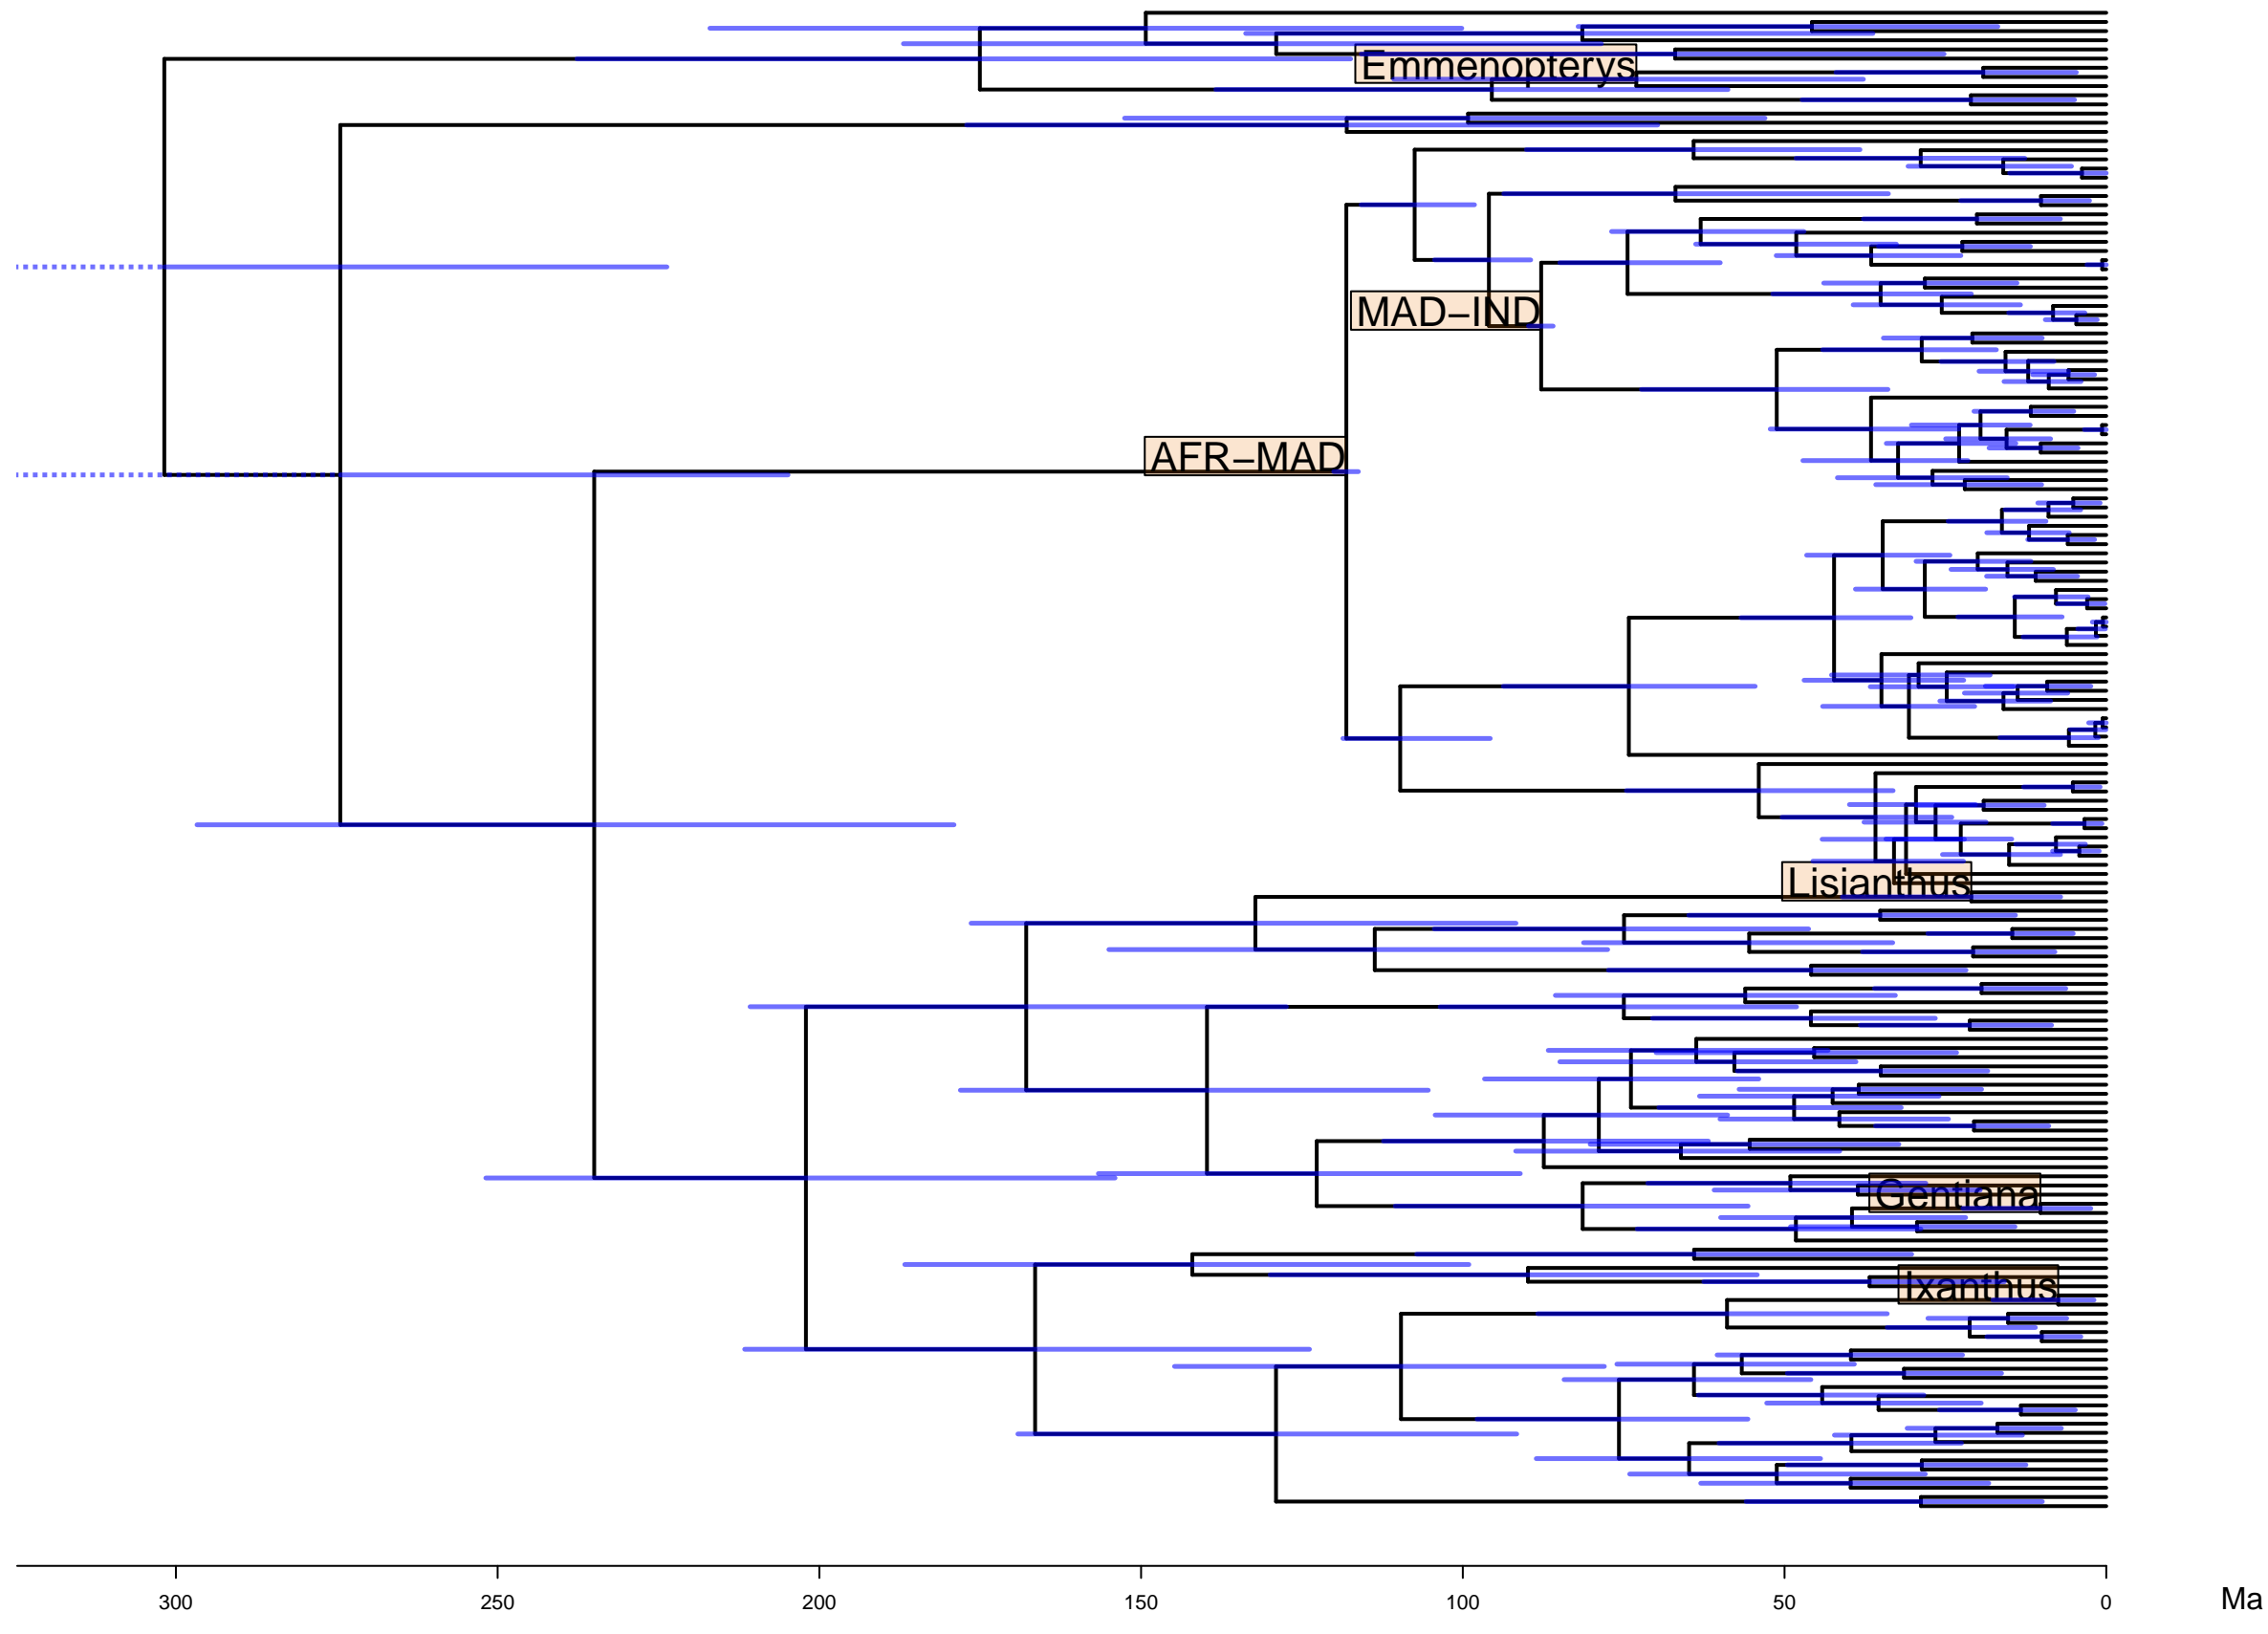

**AFR-MAD**

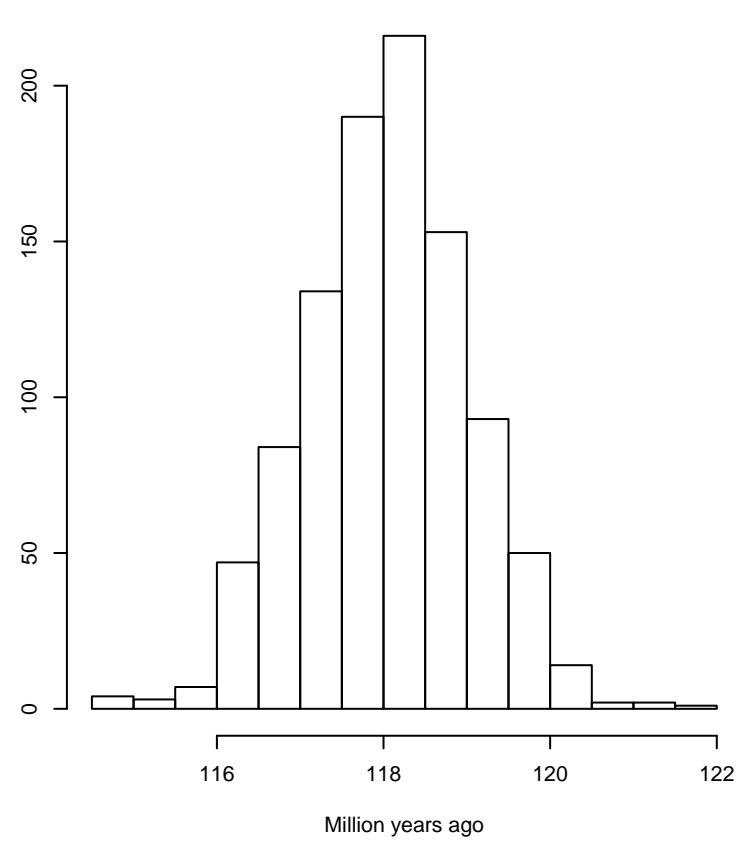

**MAD-IND**

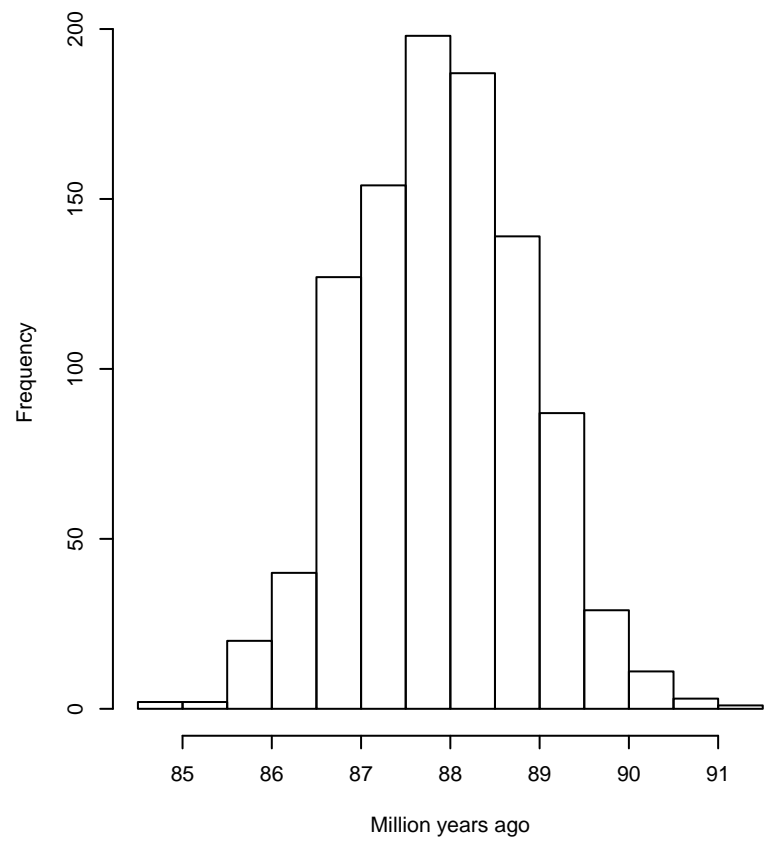

**Emmenopterys**

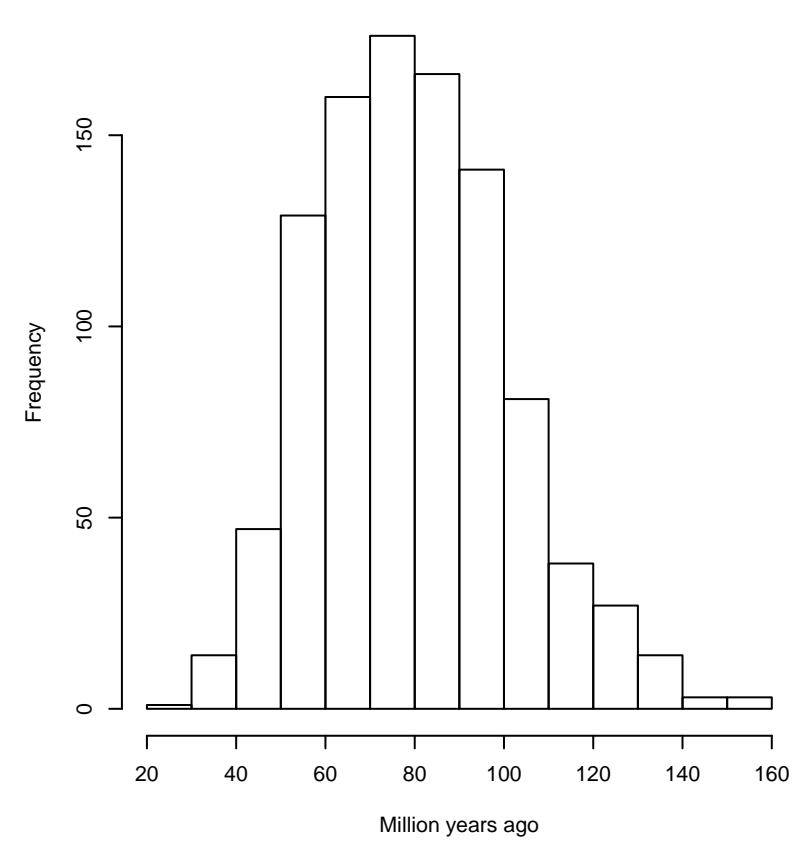

**Ixanthus**

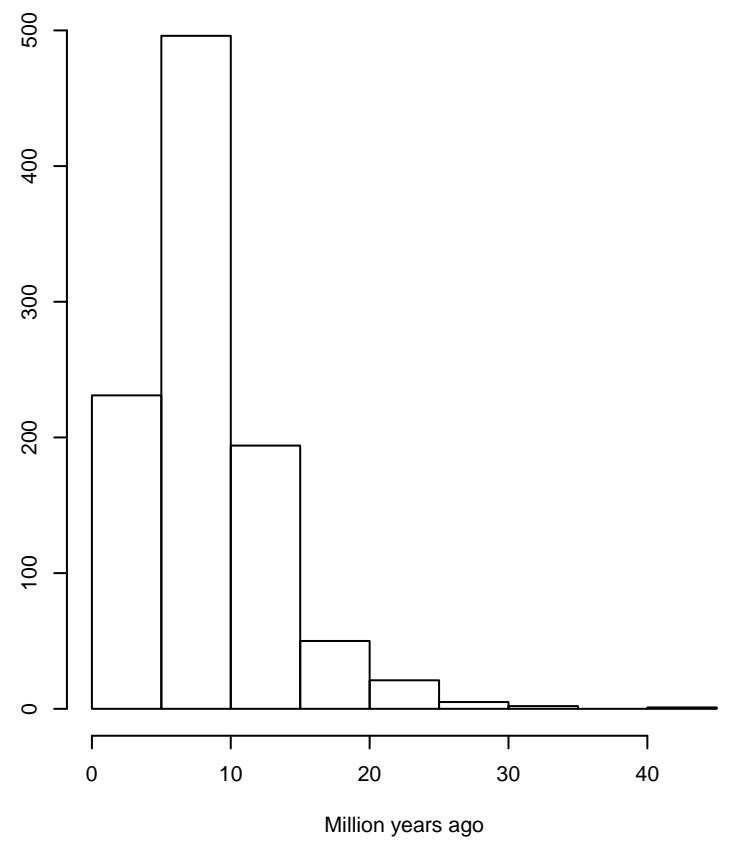

**Lisianthus**

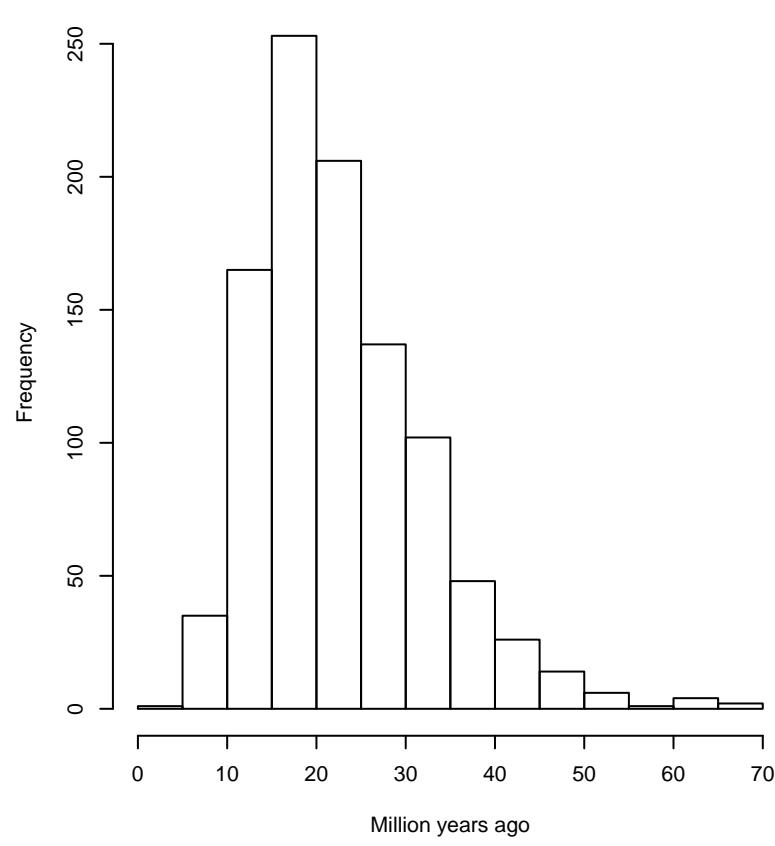

**Gentiana**

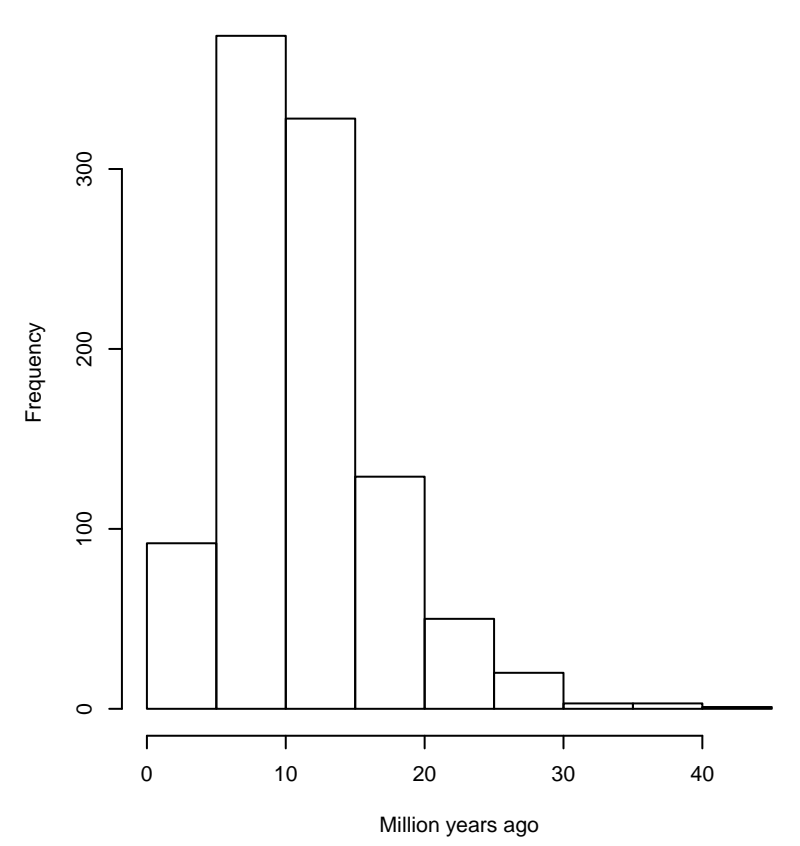

Supplement: rsbl20150086supp5.pdf [file rsbl20150086supp5.pdf]

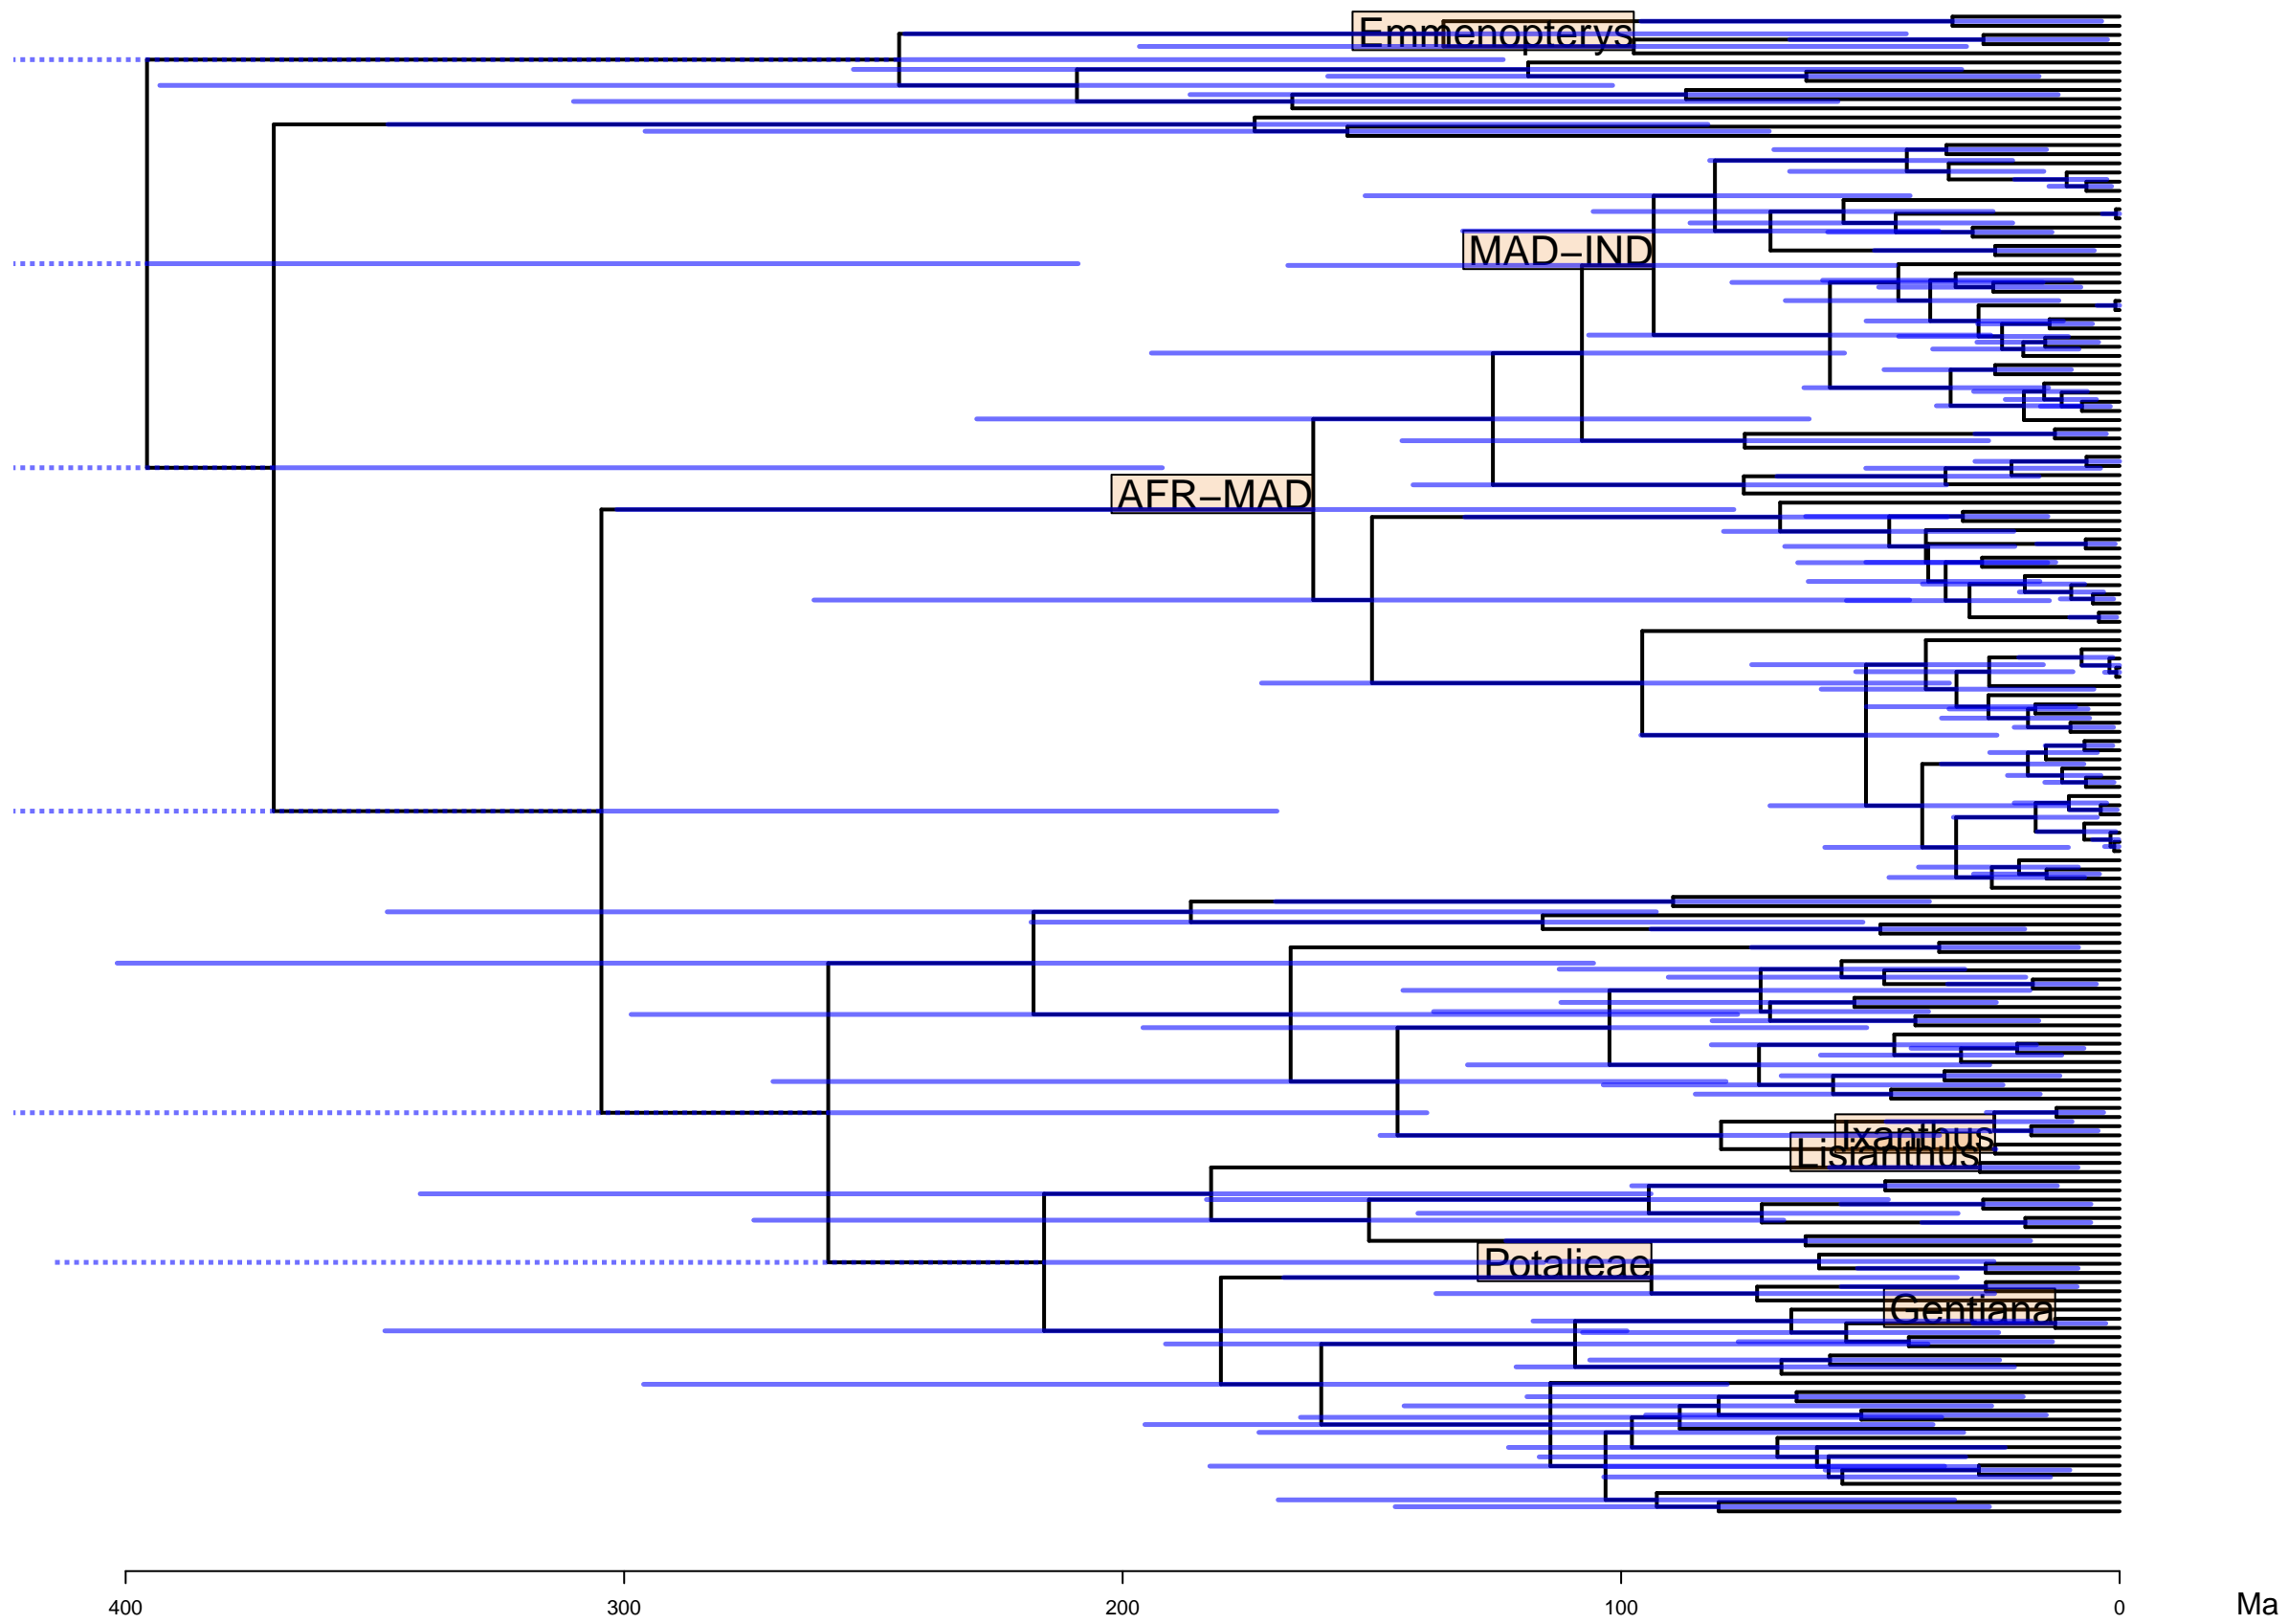

**AFR-MAD**

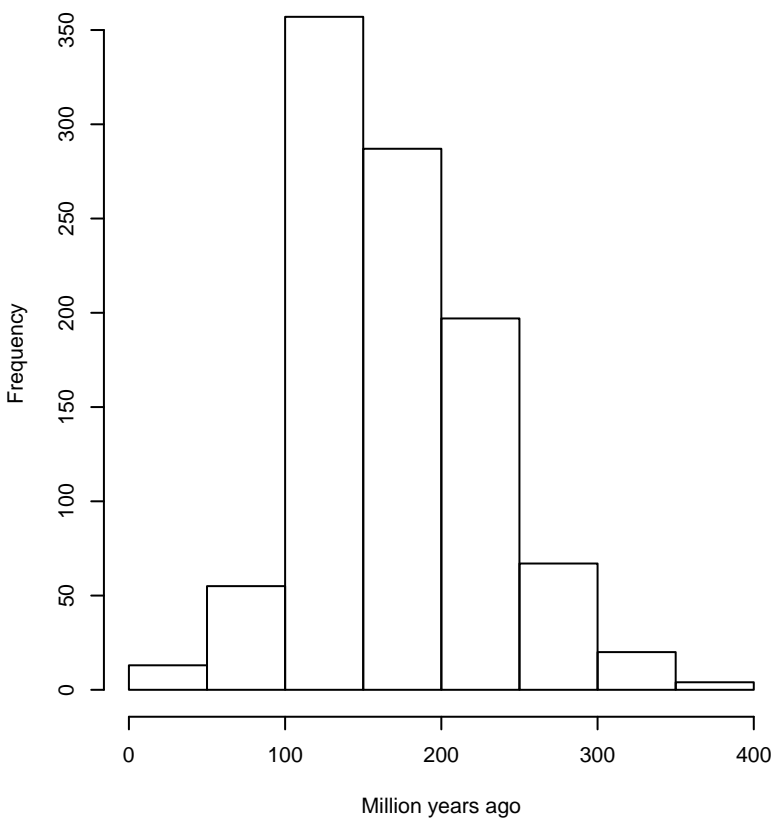

**MAD-IND**

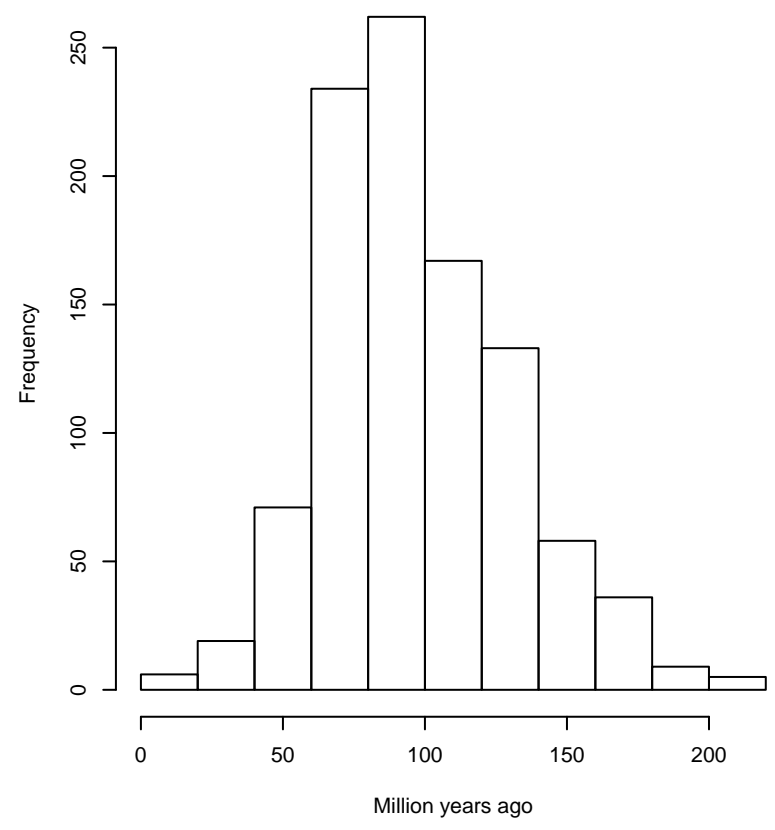

**Emmenopterys**

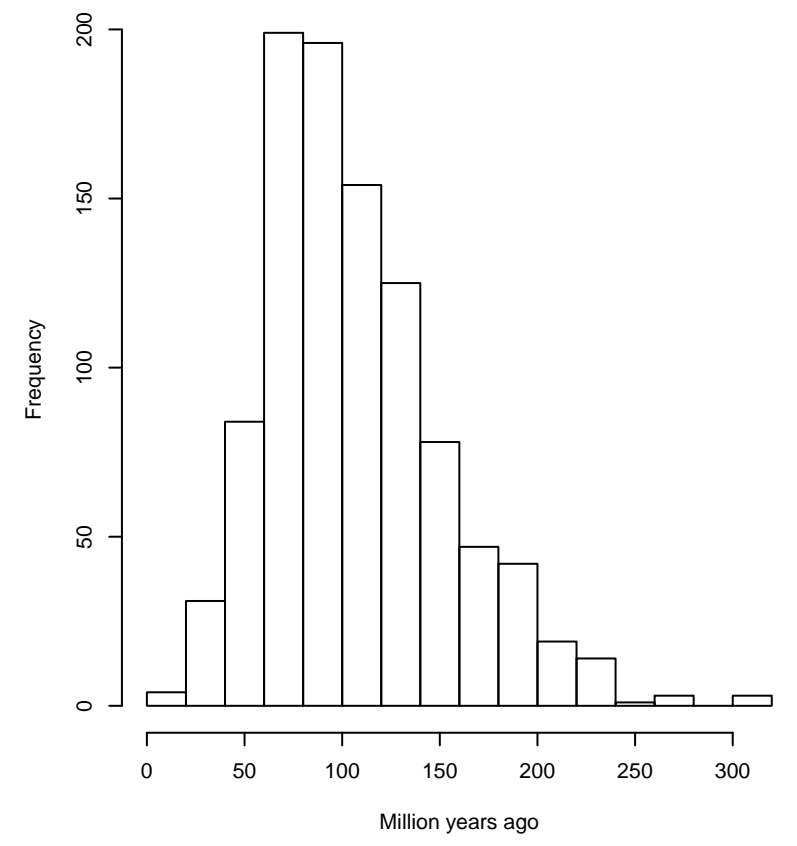

**Ixanthus**

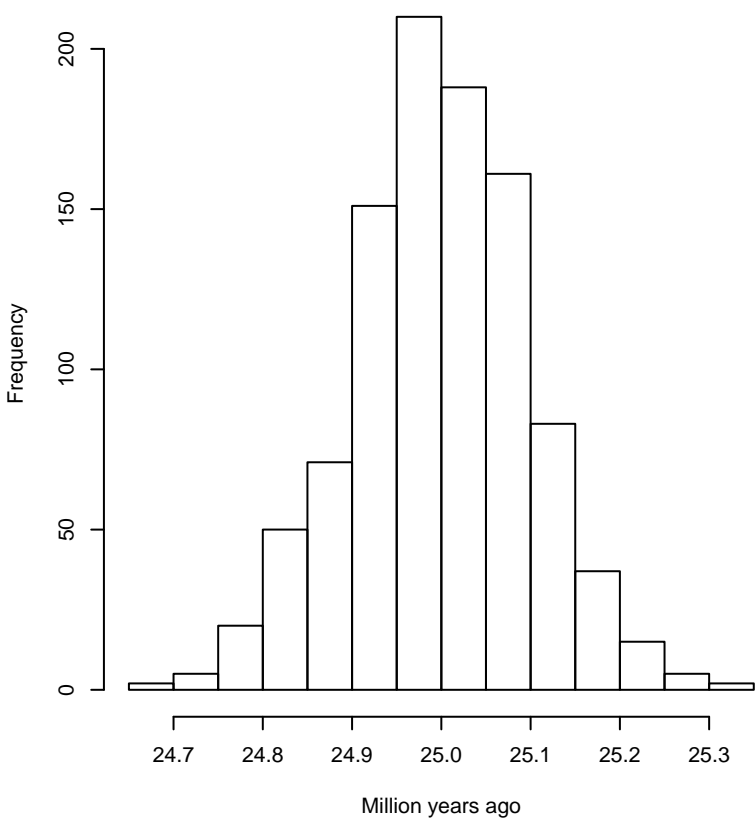

**Lisianthus**

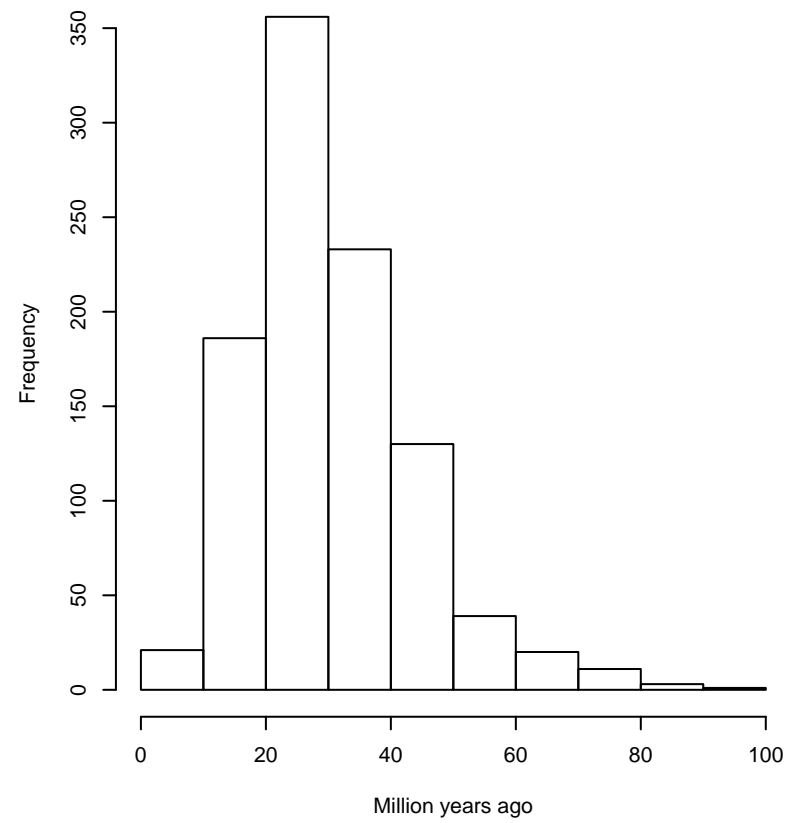

**Gentiana**

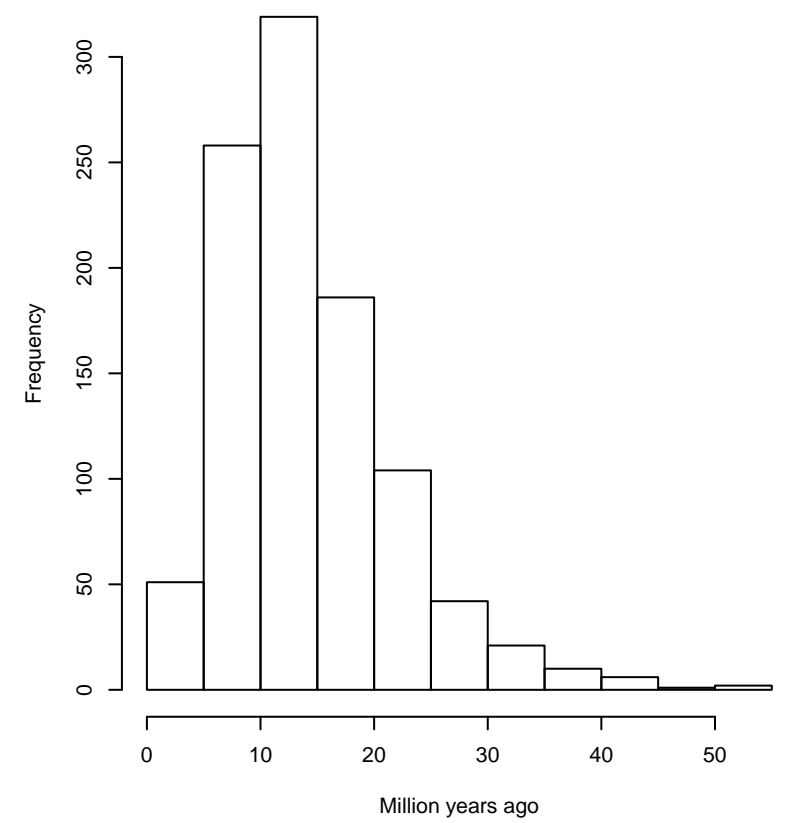

Supplement: rsbl20150086supp6.pdf [file rsbl20150086supp6.pdf]

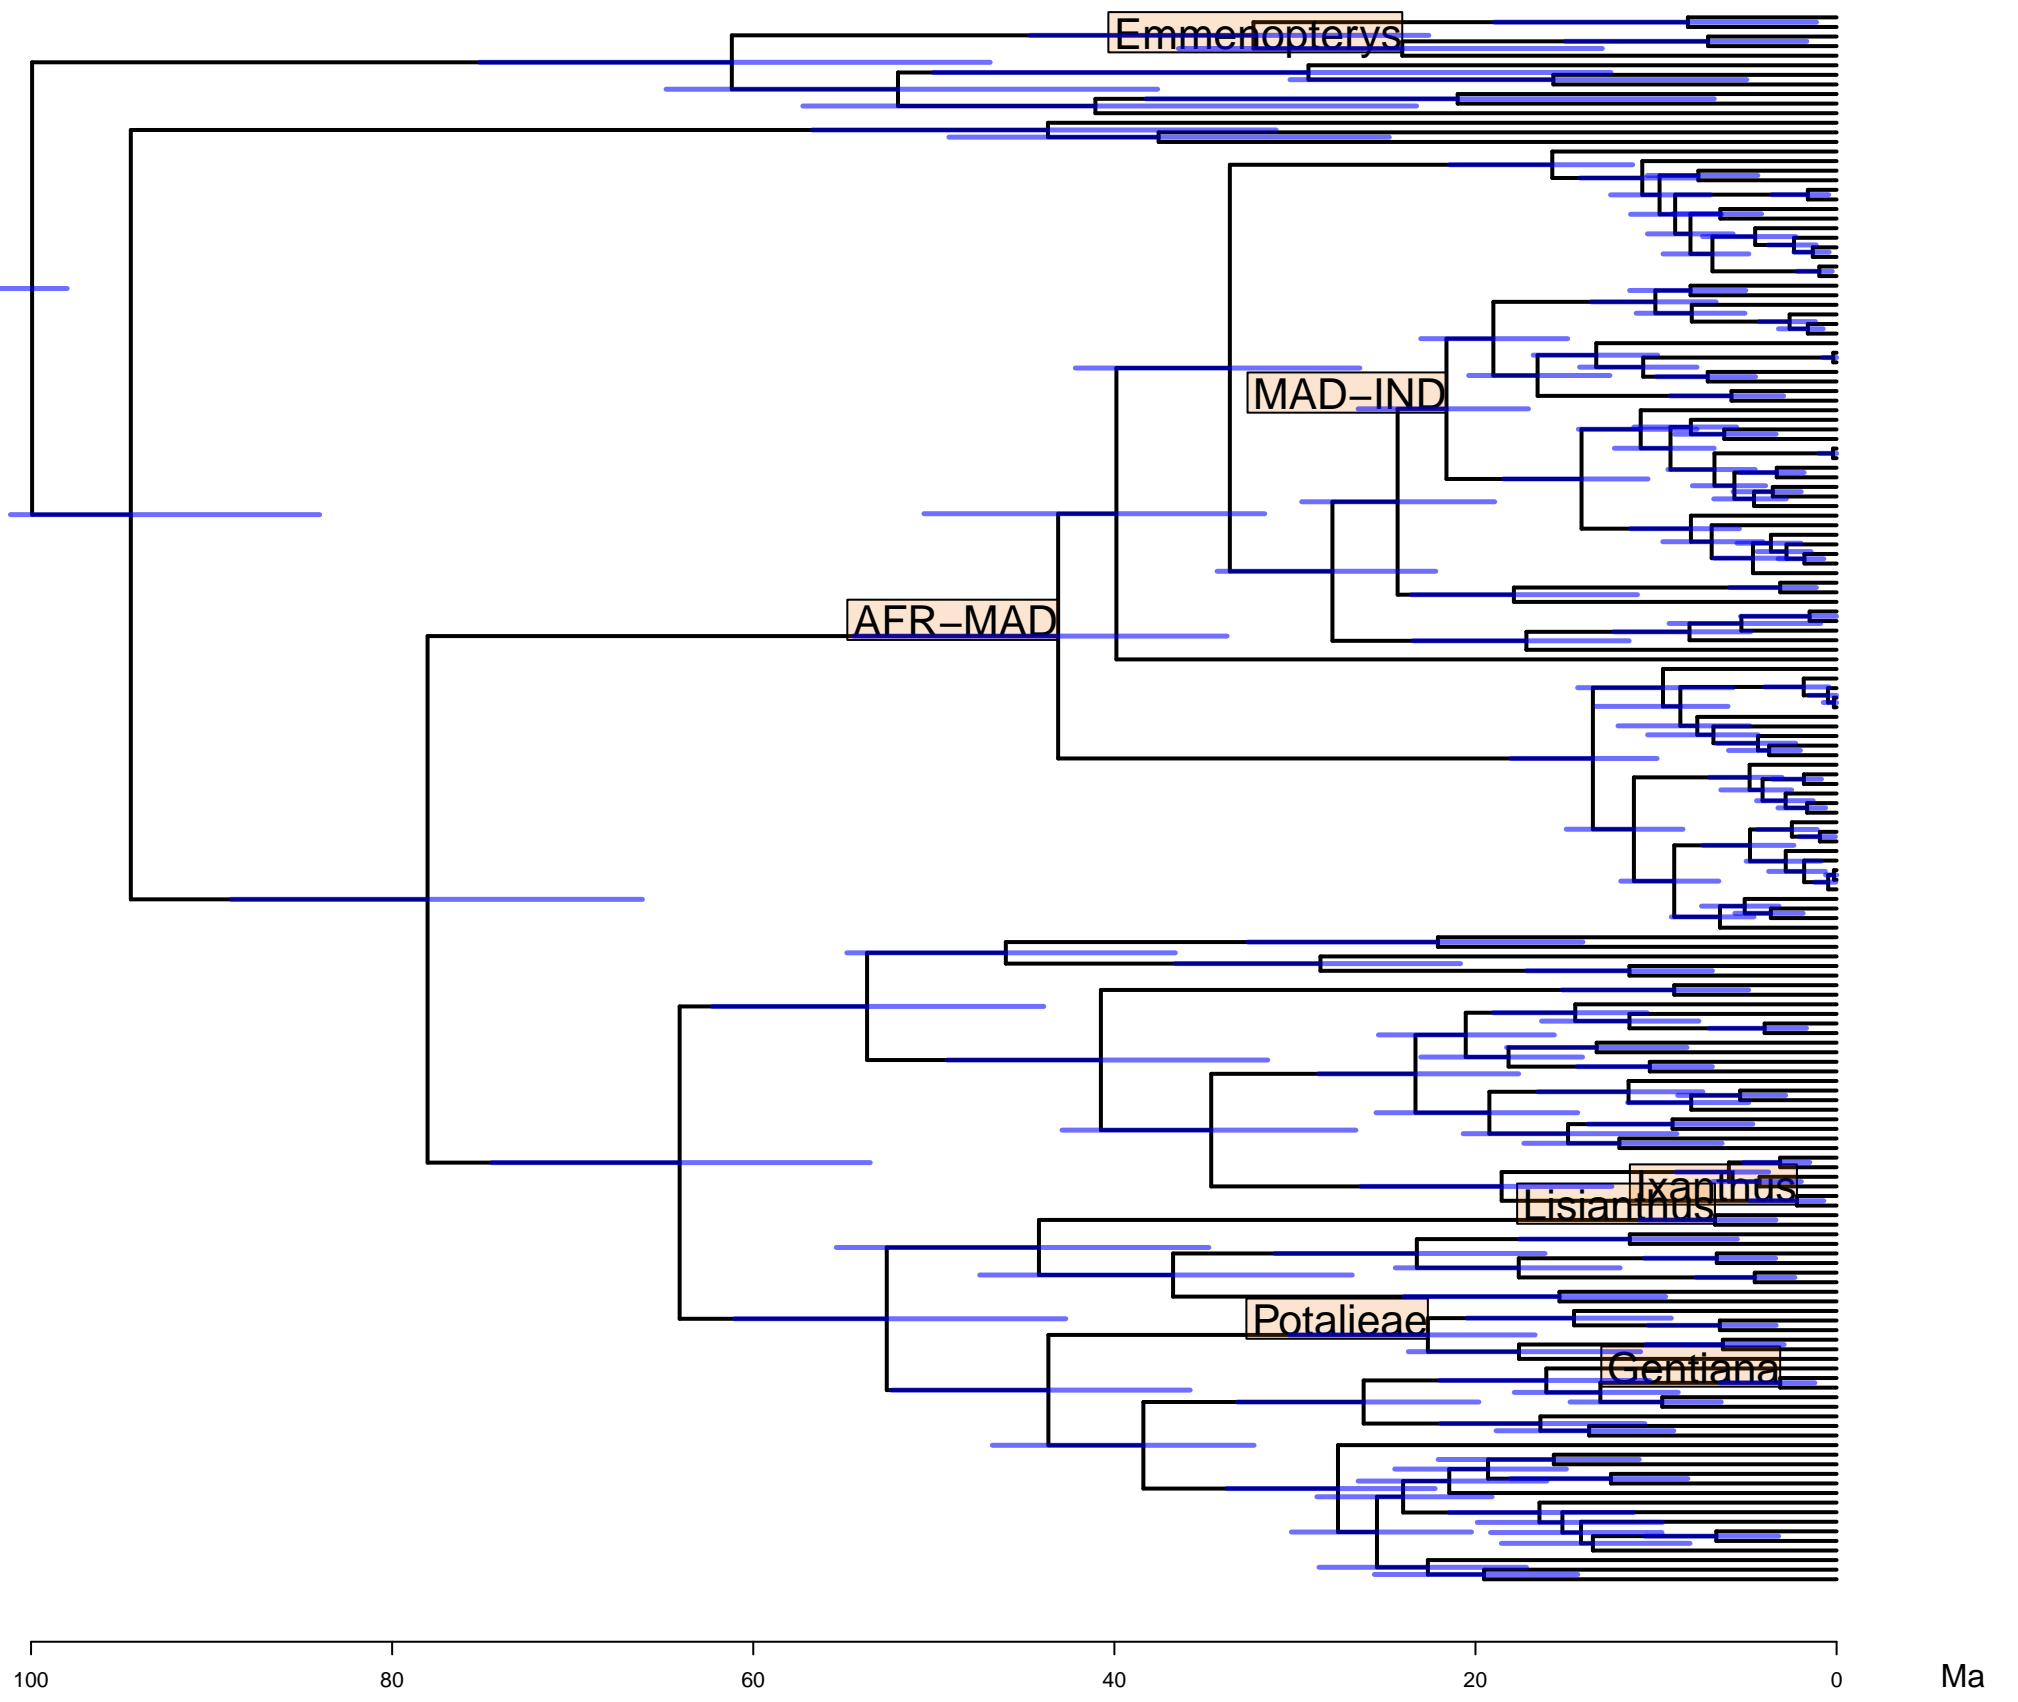

**AFR-MAD**

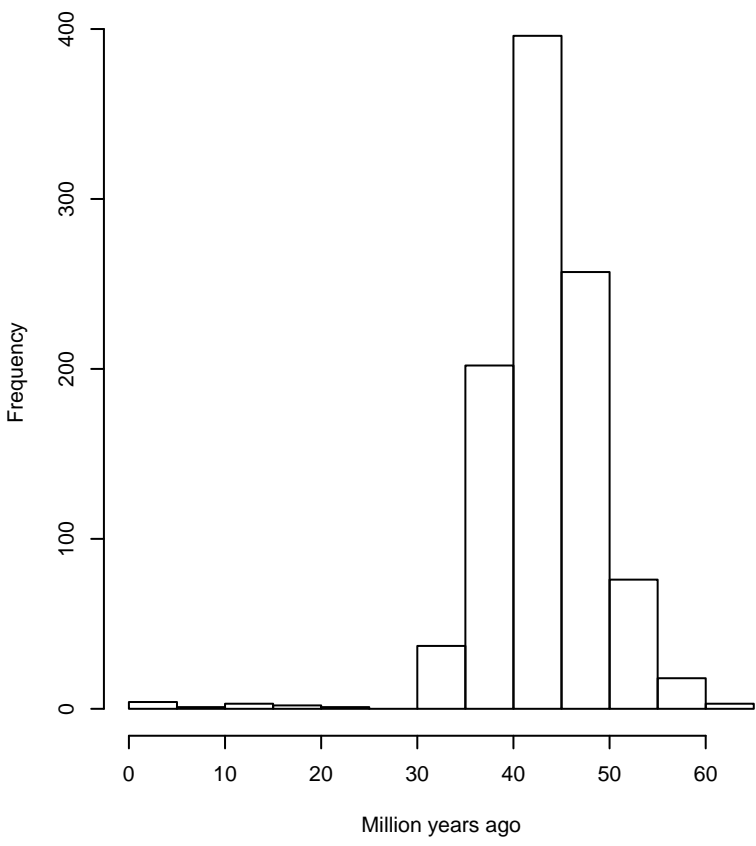

**MAD-IND**

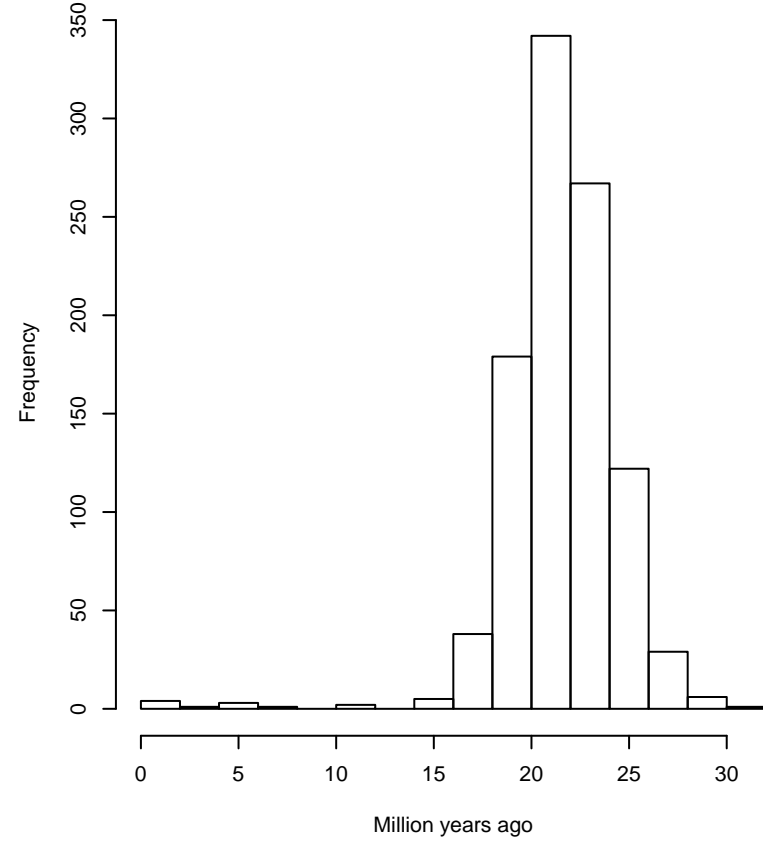

**Emmenopterys**

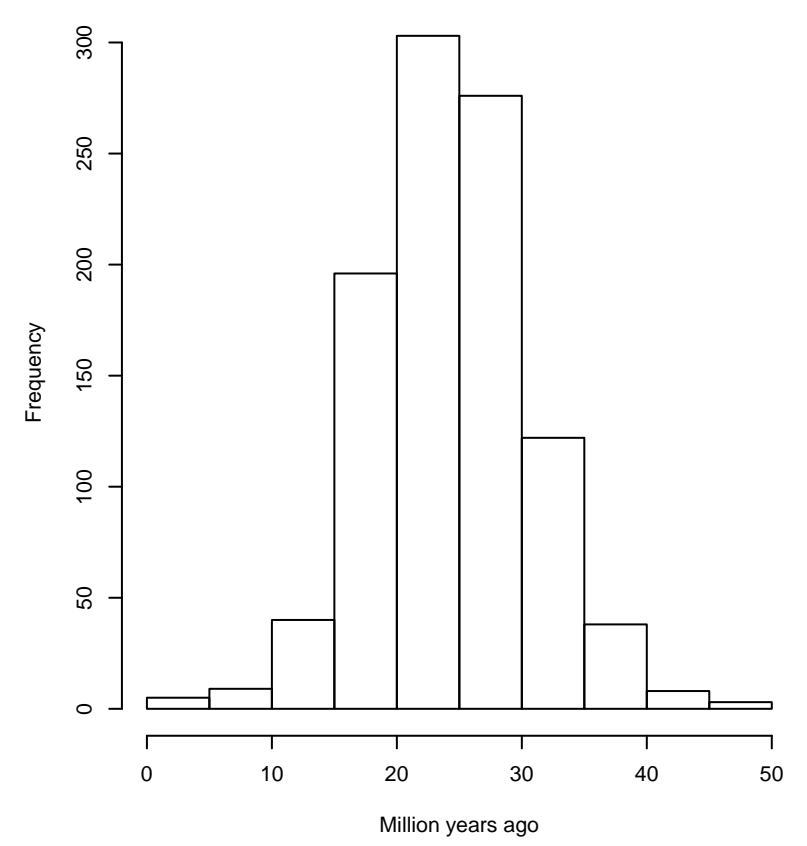

**Ixanthus**

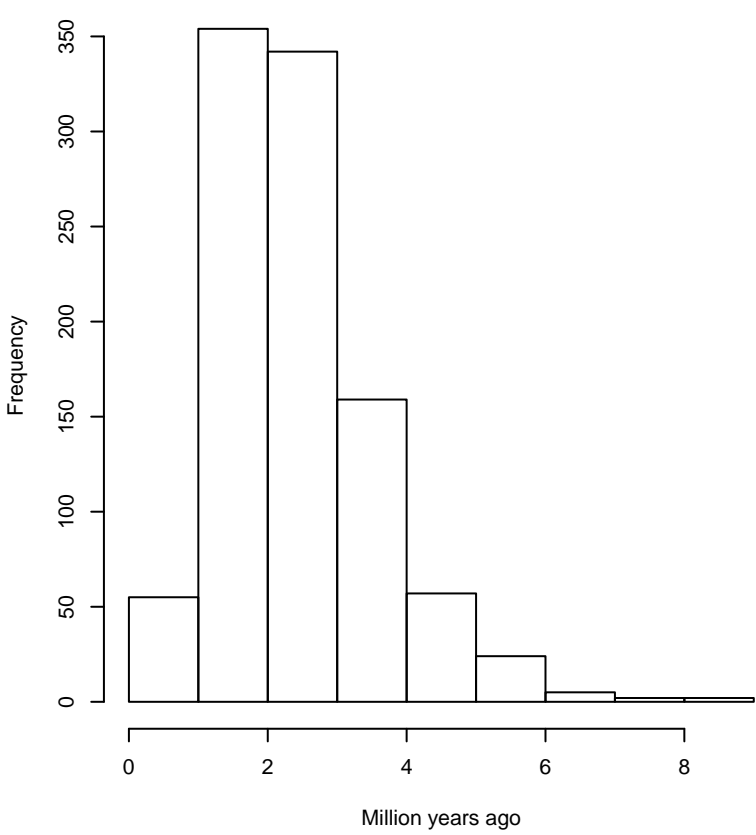

**Lisianthus**

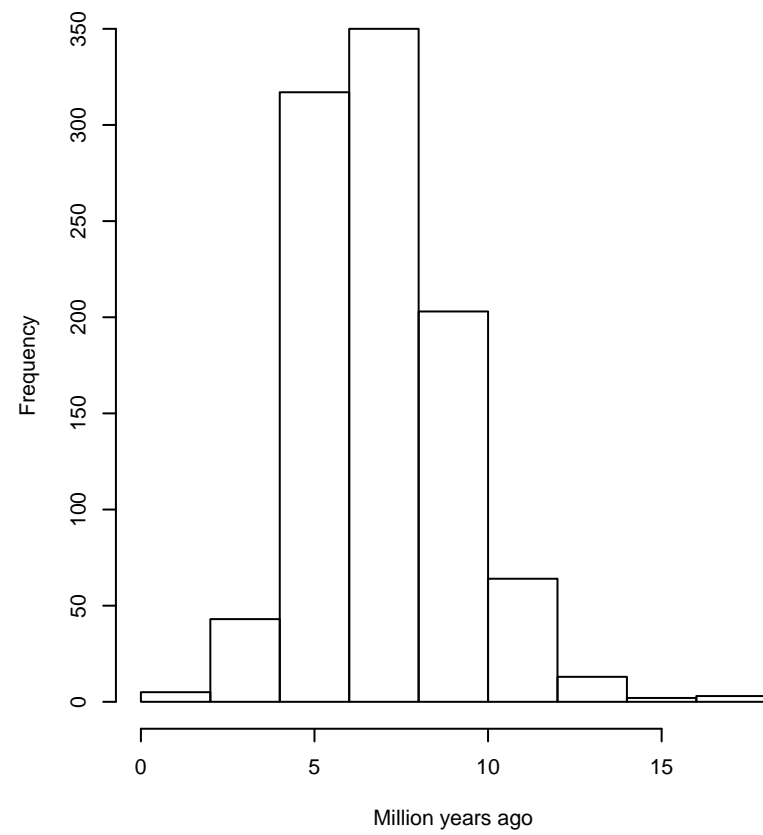

**Gentiana**

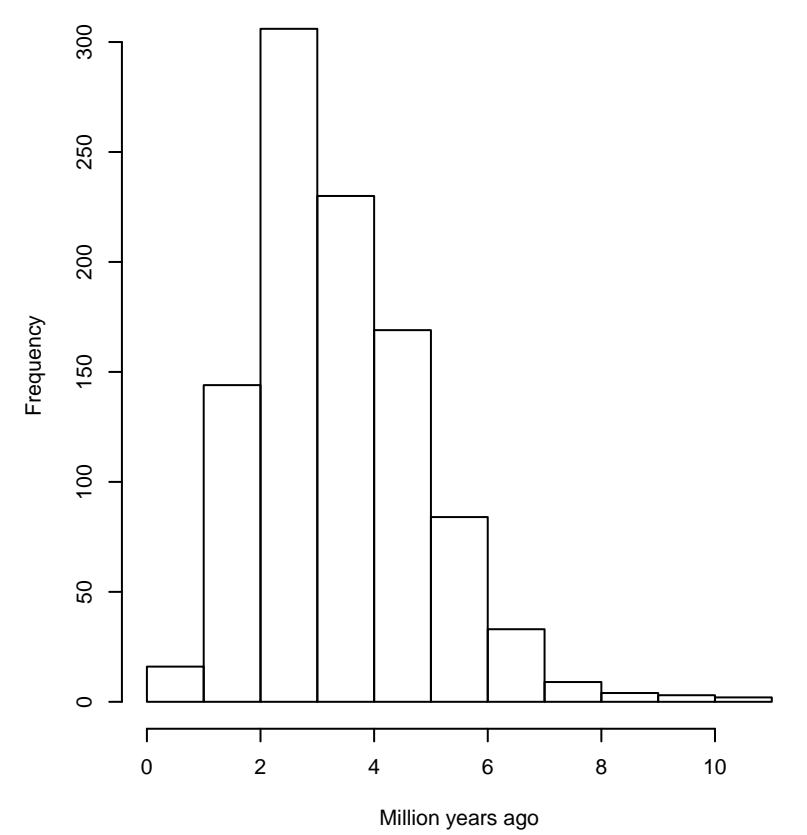

Supplement: rsbl20150086supp7.pdf [file rsbl20150086supp7.pdf]
